# Supplementary material for: Cascade targeting tumor mitochondria with CuS nanoparticles for enhanced photothermal therapy in the second near-infrared window
Source: Royal Society of Chemistry journal article supplement (doi:10.1039/d1bm00589h), 2021-01-01
Supplement: d1bm00589h1.pdf [file d1bm00589h1.pdf]

## Electronic Supplementary Information

# Cascade targeting tumor mitochondria with CuS nanoparticles for enhanced photothermal therapy in the second near-infrared window

Haiyan Wu,<sup>†a,b</sup> Pengpeng Jia,<sup>†a,c</sup> Yu Zou,<sup>a,c</sup> and Jiang Jiang<sup>\*a,c</sup>

<sup>a</sup> *i-Lab and Division of Nanobiomedicine, CAS Key Laboratory of Nano-Bio Interface, CAS Center for Excellence in Nanoscience, Suzhou Institute of Nano-Tech and Nano-Bionics, Chinese Academy of Sciences, Suzhou 215123, China.*

<sup>b</sup> *Nano Science and Technology Institute, University of Science and Technology of China, Suzhou 215123, China*

<sup>c</sup> *School of Nano-Tech and Nano-Bionics, University of Science and Technology of China, Hefei 230026, China*

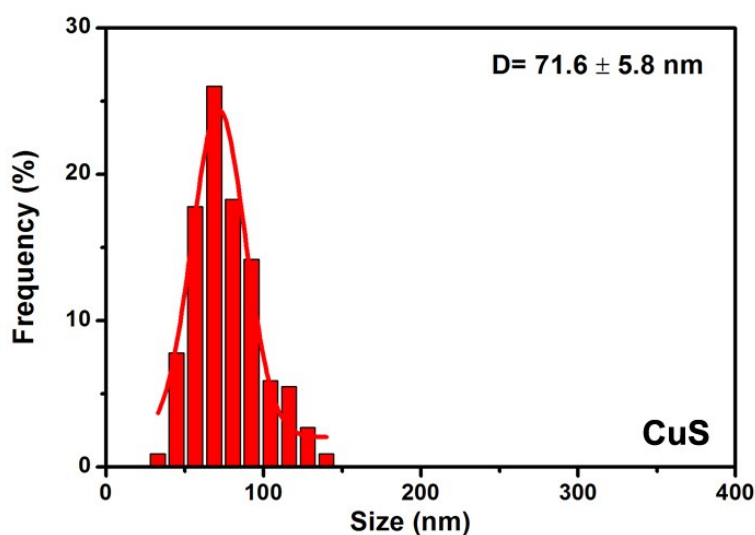

**Fig. S1** Size distribution histogram of CuS NPs determined by TEM images.

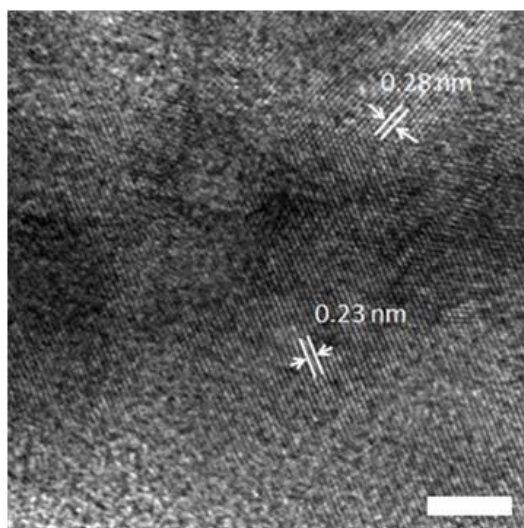

**Fig. S2** HRTEM image of CuS NPs showing characteristic lattice spacings, scale bar: 5 nm.

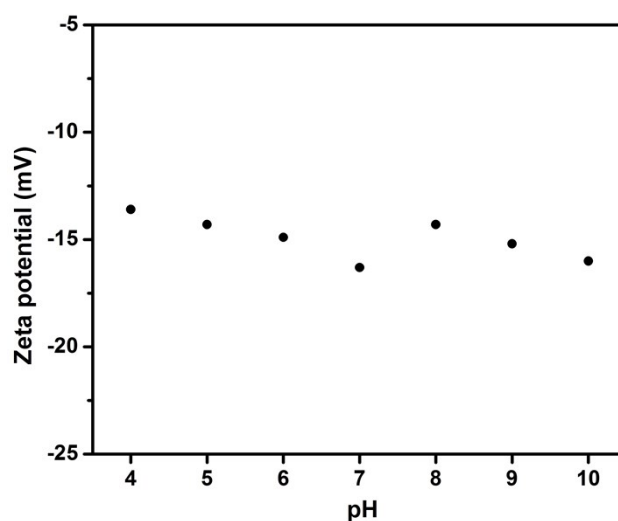

**Fig. S3** Zeta potential of CuS-TTPP-HA NPs solution between pH 4 and 10.

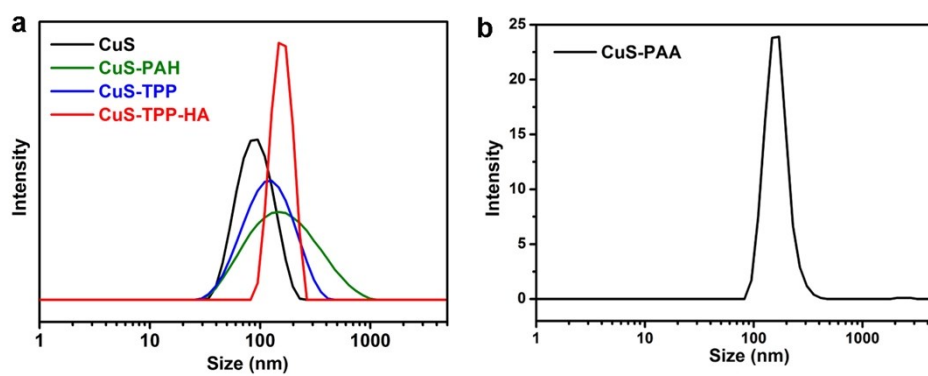

**Fig. S4** Dynamic light scattering (DLS) characterizations of (a) CuS NPs with different surface functioning molecules and (b) reference CuS-PAA NPs.

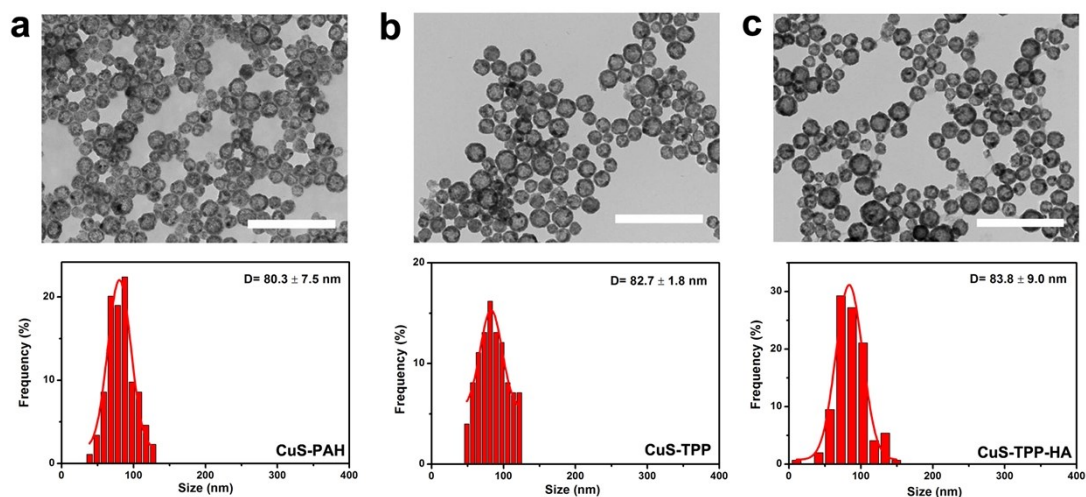

**Fig. S5** TEM images and size distribution histograms of (a) CuS-PAH, (b) CuS-TPP, and (c) CuS-TPP-HA NPs. Scale bars: 500 nm.

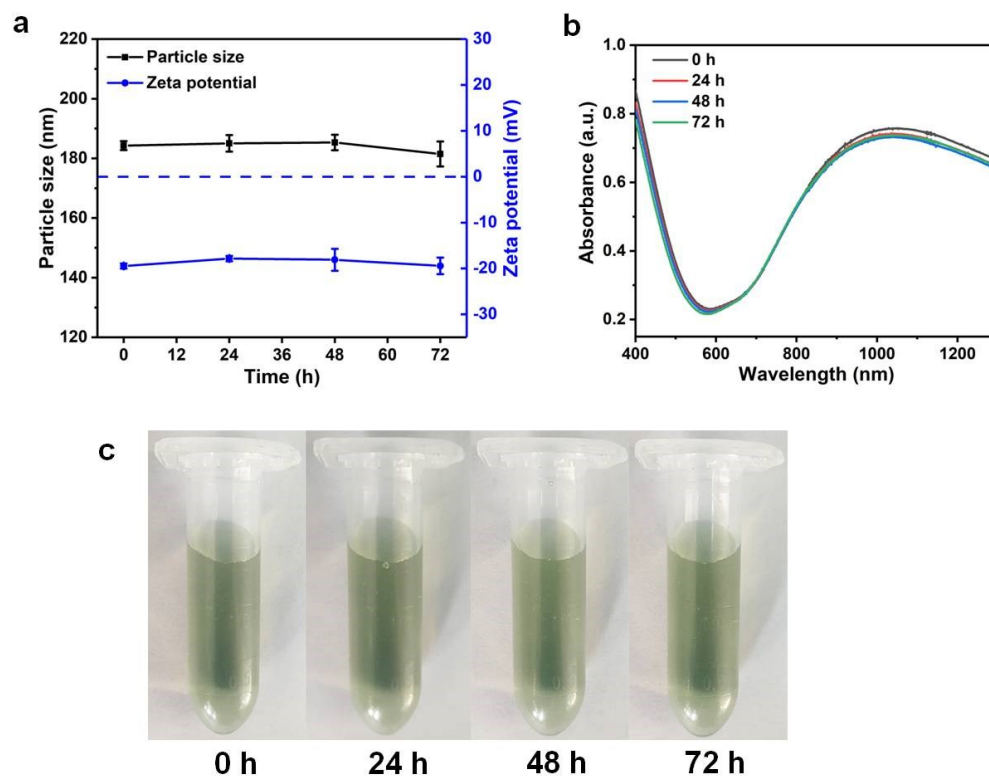

**Fig. S6** (a) Hydrodynamic size and zeta potential, (b) UV-vis-NIR absorption, and (c) visual inspection of CuS-TPP-HA NPs solution over the course of 3 days.

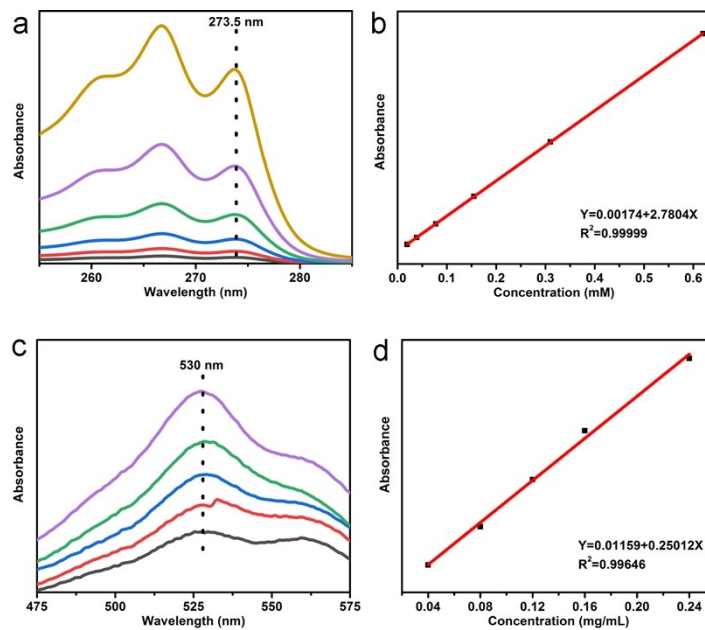

**Fig. S7** (a) Absorption spectra of different concentration TPP solution, and (b) the linear fit of absorbance at 273.5 nm as a function of TPP concentrations. (c) The absorption spectra and (d) calibration curve of HA solution based on the Elson-Morgan method.

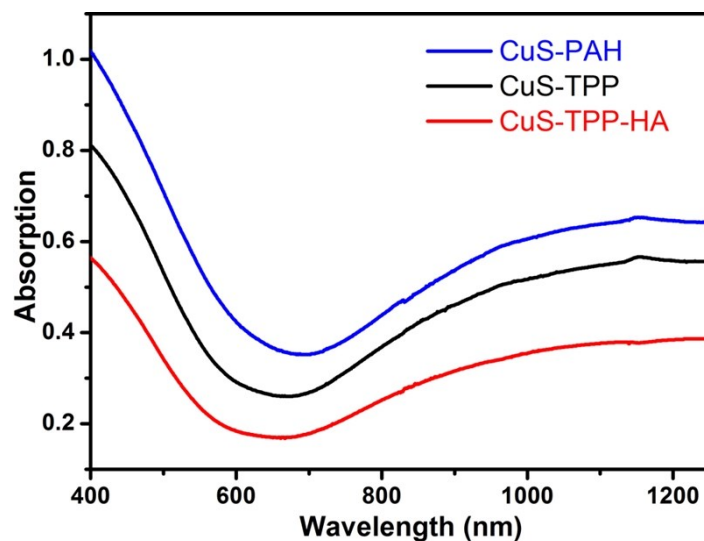

**Fig. S8** UV-vis-NIR absorption spectra of CuS NPs with different surface functional layers. The curves have been shifted arbitrarily in the vertical axis for better viewing purpose.

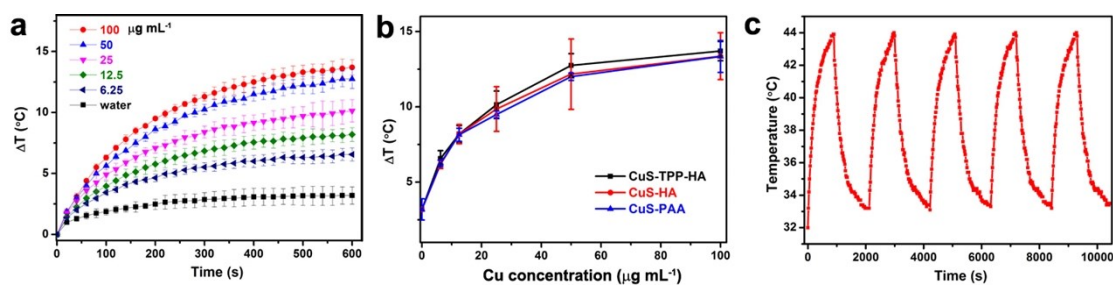

**Fig. S9** (a) Photothermal heating curves of CuS-TPP-HA NPs solution at various concentrations when being exposure to light irradiation (1064 nm,  $0.75 \text{ W cm}^{-2}$ , 10 min). (b) Final solution temperature elevation at the end of 10 min laser exposure as a function of Cu concentrations for different surface protected CuS NPs. (c) Temperature variations of five heating/cooling photothermal cycles of CuS-TPP-HA NPs solution.

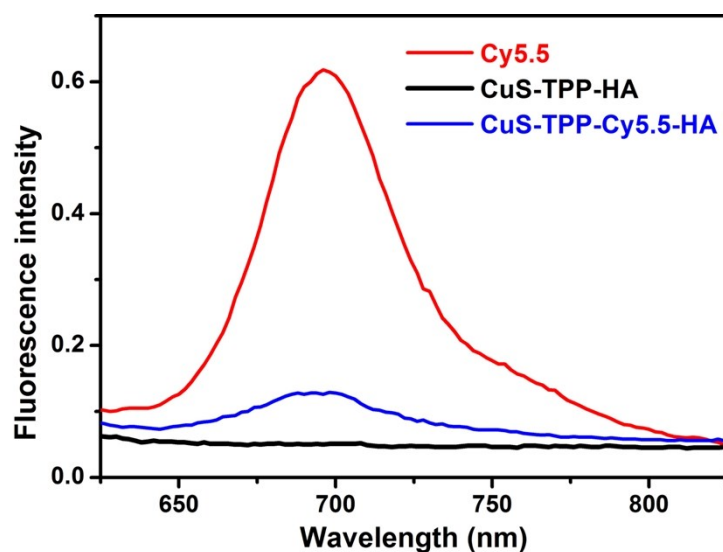

**Fig. S10** Fluorescence spectra of Cy5.5, CuS-TPP-HA NPs, and Cy5.5 labeled CuS-TPP-HA NPs solutions.

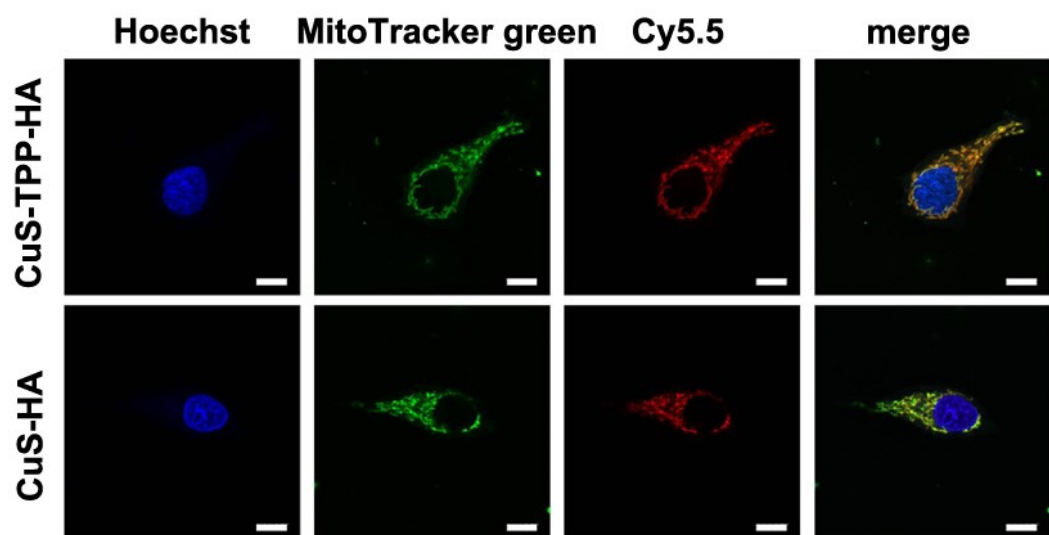

**Fig. S11** Confocal fluorescence images of MCF-7 cells incubated with CuS-Cy5.5-HA and CuS-TPP-Cy5.5-HA NPs for 4 h, with Hoechst and MitoTracker Green co-labeling nuclei and mitochondria, scale bars: 10  $\mu\text{m}$ .

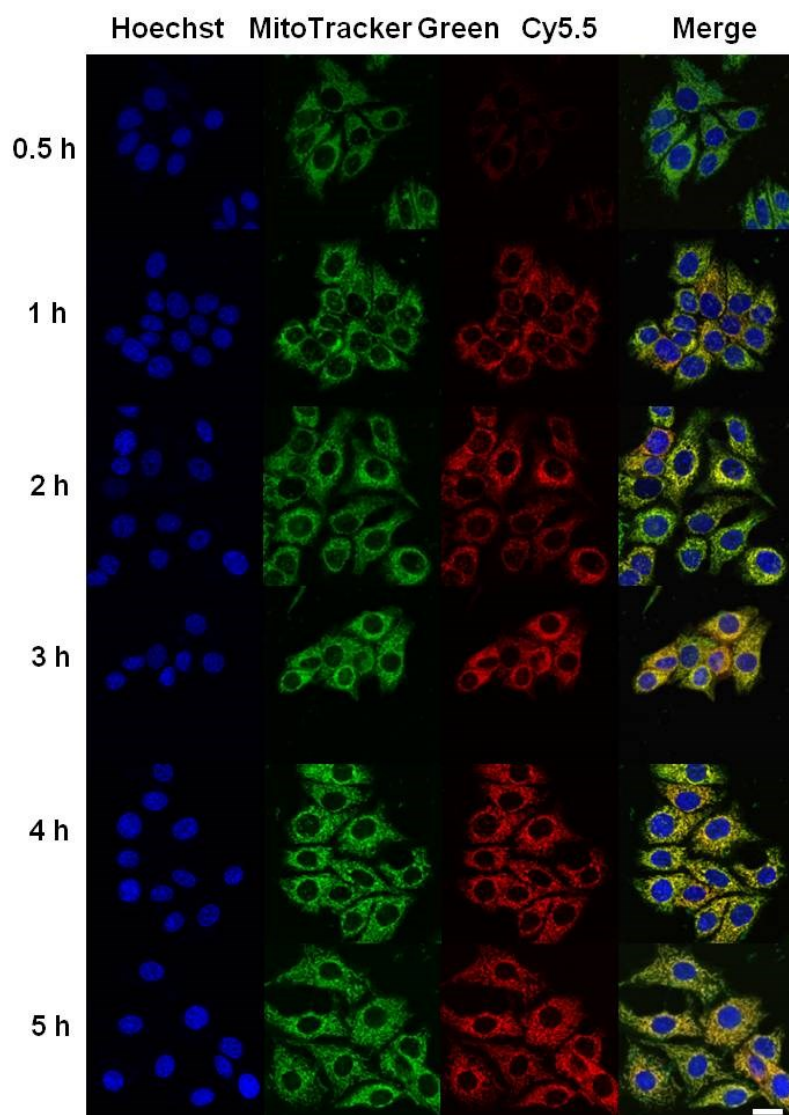

**Fig. S12** Confocal fluorescence images of MCF-7 cells incubated with CuS-TPP-Cy5.5-HA NPs for different durations, while nuclei and mitochondria were co-stained using Hoechst and MitoTracker Green, scale bar represents 20  $\mu\text{m}$ .

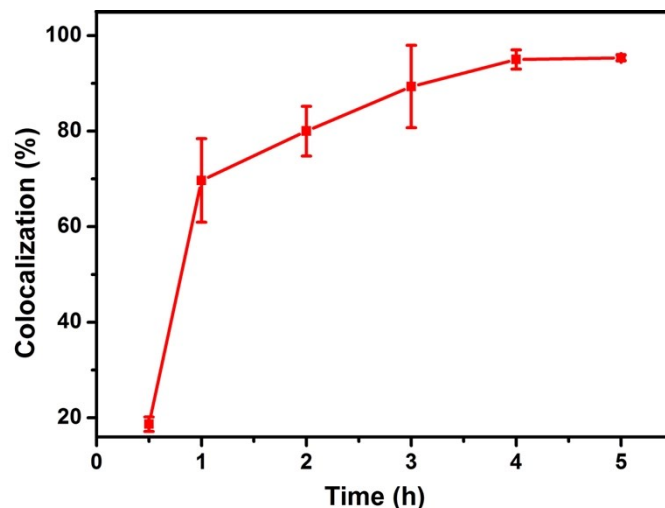

**Fig. S13** Calculated co-localization coefficient of green (MitoTracker Green) and red (Cy5.5) fluorescence shown in Fig. S12 as a function of time.

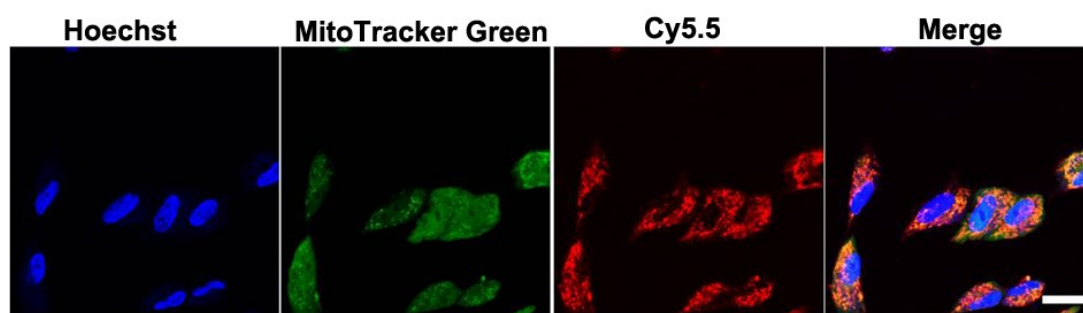

**Fig. S14** Confocal fluorescence images of HFF cells incubated with CuS-TPP-Cy5.5-HA NPs for 4 h, while nuclei and mitochondria were co-stained using Hoechst and MitoTracker Green. The calculated co-localization coefficient is 49%. Scale bar: 20  $\mu\text{m}$ .



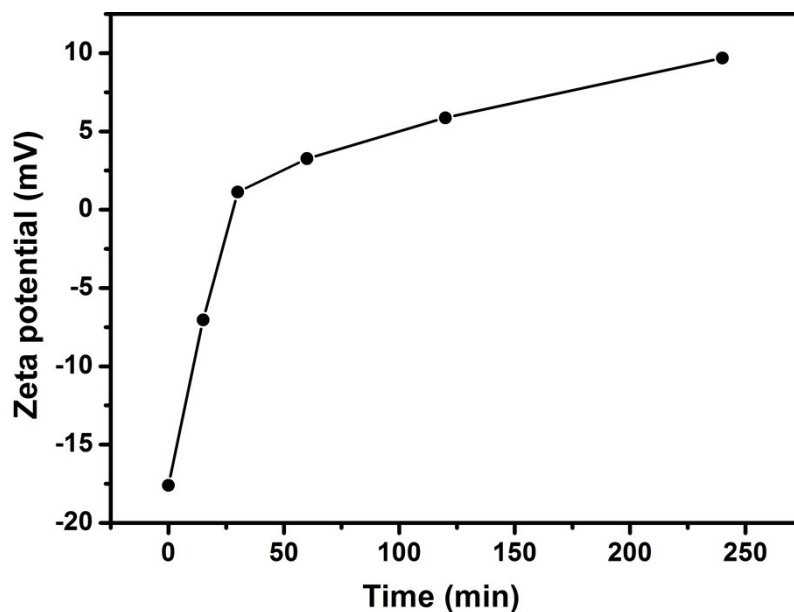

**Fig. S15** Temporal evolution of the zeta potentials of CuS-TPP-HA NPs co-incubated with HAase (at time 0).

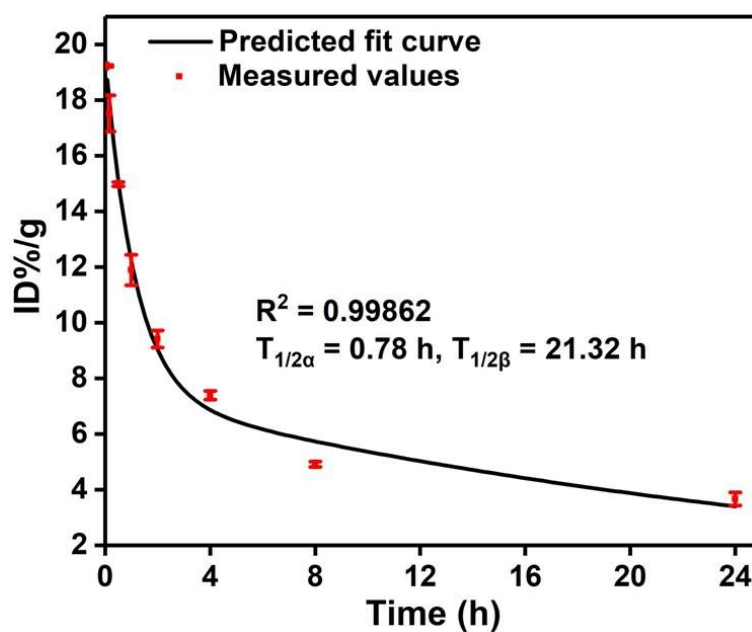

**Fig. S16** Blood circulation profile of CuS-TPP-HA NPs as determined by ICP quantifications, the fitting is based on a two-compartment model.

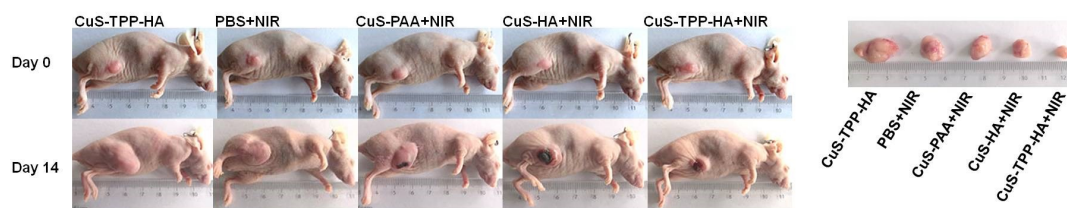

**Fig. S17** Photographs of the xenograft tumors at day 0 and day 14 after various treatments, and the dissected tumors after sacrificing mice 14 days post photothermal therapy.
